1 **A cross-species drug discovery pipeline to identify and validate new treatments for**  
2 **osteosarcoma**

3  
4 Jason A. Somarelli<sup>#\*</sup>, Gabrielle Rupprecht\*, Erdem Altunel, Etienne M. Flamant, Sneha Rao,  
5 Dharshan Sivaraj, Alexander L. Lazarides, Sarah M. Hoskinson, Maya U. Sheth, Serene Cheng,  
6 So Young Kim, Kathryn E. Ware, Anika Agarwal, Mark M. Cullen, Laura E. Selmic, Jeffrey I.  
7 Everitt, Shannon J. McCall, Cindy Eward, William C. Eward<sup>+</sup>, and S. David Hsu<sup>+</sup>

8  
9 \*these authors contributed equally

10 +these authors contributed equally

11  
12 <sup>#</sup>Address correspondence to: [jason.somarelli@duke.edu](mailto:jason.somarelli@duke.edu)

13

14 **Key words:** comparative oncology, patient-derived xenografts, precision medicine, CRM1,  
15 proteasome, sarcoma

16

17 **Conflict of interest statement:** The authors declare no conflicts of interest.

18

19

20

21

22

23

24

25

26

27

28

29

30 **Abstract**

31 **Purpose:** Osteosarcoma is a rare but aggressive bone cancer that occurs primarily in children.  
32 Like other rare cancers, treatment advances for osteosarcoma have stagnated, with little  
33 improvement in survival for the past several decades. Developing new treatments has been  
34 hampered by extensive genomic heterogeneity and limited access to patient samples to study the  
35 biology of this complex disease. **Experimental design:** To overcome these barriers, we  
36 combined the power of comparative oncology with patient-derived models of cancer and high-  
37 throughput chemical screens in a cross-species drug discovery pipeline. **Results:** Coupling *in*  
38 *vitro* high-throughput drug screens on low-passage and established cell lines with *in vivo*  
39 validation in patient-derived xenografts we identify the proteasome and CRM1 nuclear export  
40 pathways as therapeutic sensitivities in osteosarcoma, with dual inhibition of these pathways  
41 inducing synergistic cytotoxicity. **Conclusions:** These collective efforts provide an experimental  
42 framework and set of new tools for osteosarcoma and other rare cancers to identify and study  
43 new therapeutic vulnerabilities.

44

45

46

47

48

49

50

51

52

## 53 **Introduction**

54           Osteosarcoma, the most common primary bone cancer, exemplifies the progress that  
55 needs to be made in the approach to discovering new therapies. As the third most common  
56 cancer of childhood, osteosarcoma is disproportionately lethal, and patients with advanced or  
57 metastatic disease have limited treatment options [1]. Due to the low incidence of osteosarcoma  
58 and the extensive genetic heterogeneity [2], finding common genetic drivers and common  
59 pathways of relevance remains difficult, and the exact etiology remains unknown. Because of  
60 these features, progress in identifying new therapies has stagnated, and decades of research have  
61 brought almost no improvement in patient survival rates [3, 4]. Even for those patients who  
62 survive, both their life expectancy and quality of life are negatively impacted by the current  
63 treatment regimen [5]. For all of these reasons, there is a persistently unmet need to develop new  
64 therapies for this deadly disease.

65           The story of osteosarcoma is the story of many cancers, especially uncommon ones:  
66 Alternative therapeutic approaches are urgently needed, but the path forward is not clear. How  
67 can we identify, design, and test new molecular therapies in a disease that is both rare and  
68 genetically diverse? Mouse models are a critical tool, but additional translational steps are  
69 needed. To complete these additional steps, we are able to look to dogs with osteosarcoma.  
70 While there are approximately 800 cases of human osteosarcoma diagnosed each year, there are  
71 at least 30,000 cases of canine osteosarcoma diagnosed each year [6, 7]. Treatments in canine  
72 and human osteosarcoma patients are identical, and studies have revealed remarkable genomic  
73 conservation between canine and human osteosarcoma, with shared molecular alteration of  
74 known cancer pathways and shared amplifications of known oncogenes [8-11]. Canine patients  
75 with spontaneous disease – in contrast to genetically-engineered mouse models – offer a high

76 incidence of spontaneous tumors that are comparable to humans biologically and genetically [7,  
77 12], share environmental factors with humans, have an intact immune system, and possess  
78 similar clinical presentation including progression, resistance, recurrence, and metastasis. Most  
79 importantly, canine osteosarcoma patients have a shorter course of disease than human  
80 osteosarcoma patients, which means therapeutic discoveries could be made more quickly with a  
81 platform that integrates canine osteosarcoma into our current disease models (reviewed in [13]).  
82 Naturally-occurring osteosarcoma in dogs offers an unparalleled opportunity to understand the  
83 genomics of the disease, to learn about disease progression, and to trial new investigational drugs  
84 that would otherwise take too long to accrue in human studies.

85 Patient-derived models of cancer, including low-passage cell lines [14], patient-derived  
86 organoids [15, 16], and patient-derived xenografts (PDXs) [17], are increasingly being used as  
87 “standard” preclinical models to identify sensitivities to new candidate therapeutics across  
88 cancers. Patient-derived xenografts are also being used to predict drug response [18] and identify  
89 novel drug combinations [19]. Organoid models are also now being developed to test response to  
90 immunotherapies, as the organoids for several cancer types have been shown to contain  
91 infiltrating lymphocytes [20, 21]. Combinations of these patient-derived models are currently  
92 being explored to develop precision medicine strategies for cancer care [22]. However,  
93 translating new discoveries in real time remains a challenge in human patients, in whom disease  
94 progression can be slow and whose overall picture can be complicated by a variety of treatments,  
95 both for the cancer and for comorbid conditions.

96 Here we combine the advantages of a comparative oncology approach (e.g. larger  
97 numbers of patients, fewer confounding treatment variables, more rapid disease progression)  
98 with patient-derived models to develop and refine a cross-species drug discovery pipeline. The

99 pipeline uses patient samples from either pet dogs or humans to generate patient-matched, low-  
100 passage cell lines, and PDXs. Cell lines are used to perform high-throughput chemical screens,  
101 and top hits are validated *in vivo* using matched PDX models (**Figure 1A**). Using this approach,  
102 we identified the proteasome and CRM1 nuclear export pathways as therapeutic vulnerabilities  
103 for osteosarcoma. Using *in vitro* and *in vivo* validations, we show that inhibition of both the  
104 proteasome and CRM1 pathways acts synergistically to inhibit osteosarcoma growth. Together,  
105 these results demonstrate the utility of our cross-species drug discovery pipeline to identify new  
106 targets and strategies to treat osteosarcoma and other rare cancers.

107

## 108 **Results**

### 109 Development of a cross-species drug discovery pipeline.

110 Osteosarcomas and other rare cancers suffer from a lack of access to patient-derived models for  
111 study. We reasoned that increased access to a larger patient population with nearly-identical  
112 biology could have significant benefits in identifying actionable pathways in osteosarcoma. To  
113 this end, we developed a cross-species pipeline that leverages the increased canine patient  
114 population and the extensive biological similarities between humans and pet dogs with naturally-  
115 occurring sarcomas. The pipeline uses patient tumor tissue from dogs or humans to create  
116 patient-derived xenografts (PDXs) that are grown and passaged in immunocompromised mice  
117 (**Figure 1A**). These PDXs are used to create matched, low-passage, patient-derived cell lines.  
118 The cell lines are applied to high-throughput screens to identify candidate therapies, and top  
119 candidates are validated *in vivo* using patient-matched PDXs (**Figure 1A**) to identify therapeutic  
120 vulnerabilities that are shared across species. To date, we have created a total of 9 human  
121 (**Figure 1B**) and 20 canine sarcoma PDXs (**Figure 1C**).

122  
123  
124  
125  
126  
127  
128  
129

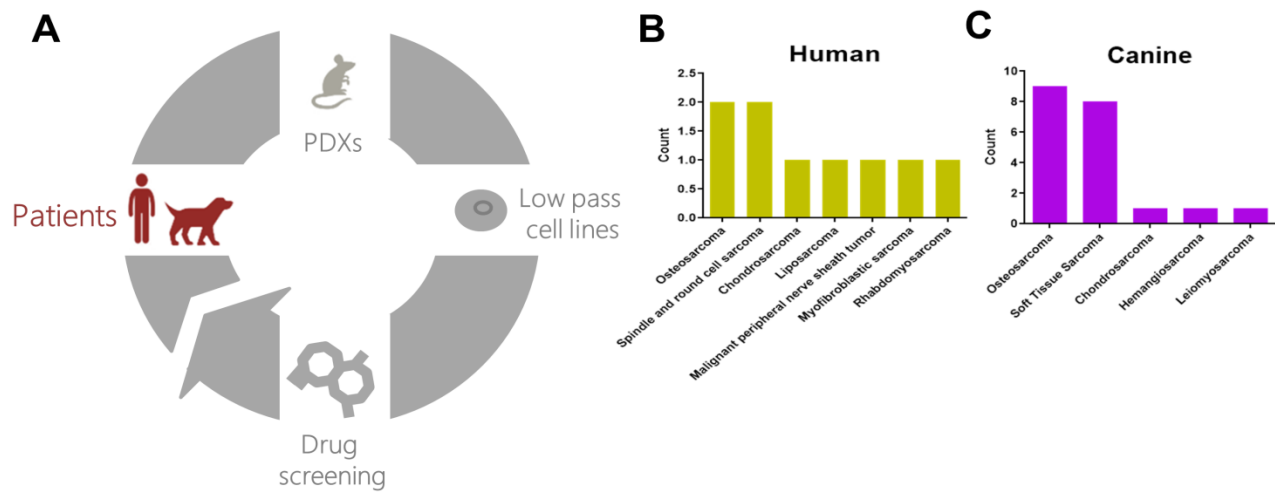

130 **Figure 1. A cross-species personalized medicine pipeline using patient-derived models of cancer. A.**  
131 The pipeline uses tumor samples from human and canine patients to establish matched patient-derived  
132 xenografts and low-passage cell lines. The cell lines are used in high-throughput drug screens, and results  
133 from the screen are validated in matched patient-derived xenografts. **B.** A summary of human (top) and **C.**  
134 dog (bottom) samples obtained and number of patient-derived xenografts created.

133

134 The cross-species pipeline identified CRM1 and proteasome inhibition as novel treatments for  
135 osteosarcoma. We applied our pipeline to reveal novel therapeutic vulnerabilities at both the  
136 individual patient level and, more importantly, shared across osteosarcomas. To do this, we  
137 created matched cell lines from both dog (D418) and human (17-3X) PDXs. Both PDXs were  
138 confirmed as osteosarcoma by histopathology (**Figure 2A, B**). Using the PDX tissue, we created  
139 clonally-purified cell lines. The 17-3X human osteosarcoma cell line exhibits a more spindle-  
140 shaped morphology while the D418 dog osteosarcoma cell line displays a rounded, cobblestone-  
141 like morphology (**Figure 2A, B**, right panels). Clonally-derived cell lines were confirmed to be  
142 free of detectable mouse fibroblasts using species-specific PCR assays designed to detect human,  
143 dog, and mouse DNA (**Figure 2C, D**). The 17-3X cell line has an estimated doubling time of  
144 approximately 40 hours (**Figure 2E**) while the D418 line grows more rapidly, with an estimated  
145 doubling time of approximately 21 hours (**Figure 2F**). The 17-3X and D418 low-passage cell

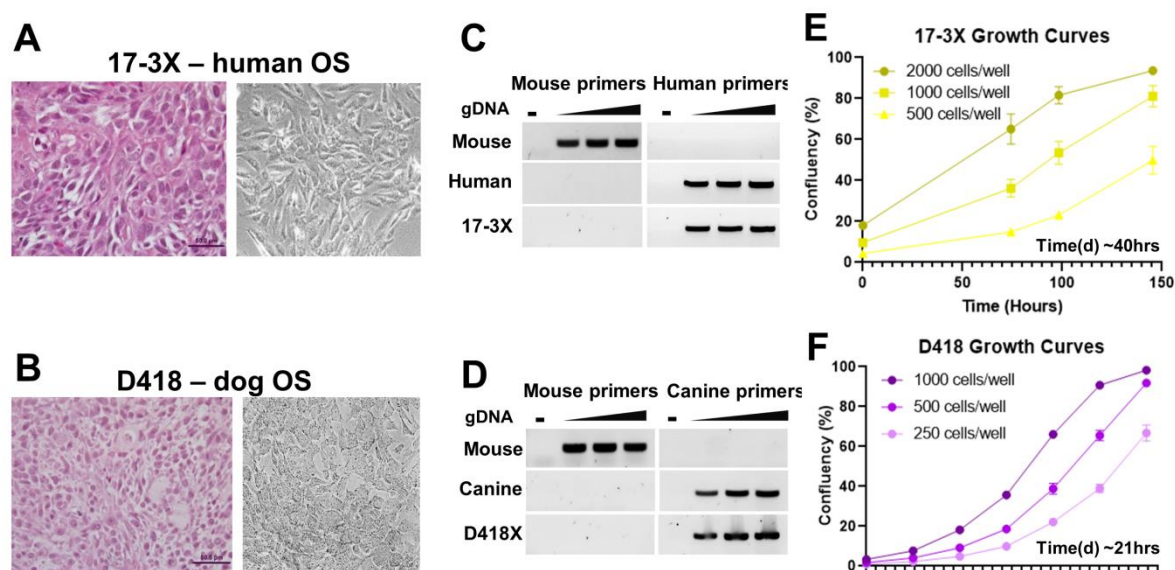

**Figure 2. Cross-species analysis of drug activity reveals remarkable similarity in response. A.** Establishment of matched patient-derived xenografts and cell lines from human (17-3X) and **B.** dog (D418) osteosarcomas. **C.** and **D.** Species-specific PCRs are used to verify the cell lines are purified cancer cell lines devoid of mouse fibroblast contamination. **E.** The estimated doubling times for the 17-3X and D418 cell lines are approximately 40 and **F.** 21 hours, respectively.

146 lines were combined with a panel of seven additional established osteosarcoma cell lines from  
147 both humans and dogs to perform high-throughput screens using 119 FDA-approved small  
148 molecule oncology drugs. These screens revealed several trends: 1) cell line-specific variation in  
149 responses were observed across the panel, with some cell lines more broadly resistant to drugs in  
150 the screen, such as U2OS and D17, and other lines more sensitive, such as 17-3X and Abrams  
151 (**Figure 3A**); 2) hierarchical clustering of the nine cell lines using the drug responses for each  
152 cell line revealed species-specific clustering of the cell lines, with distinct human and dog clades  
153 formed based on response of each cell line to the entire panel of drugs (**Figure 3A**); 3) while cell  
154 lines clustered by species, there was overall consistency in the average percent killing across all  
155 cell lines, particularly among the top hits (**Figure 3B**). Together, these results suggest that  
156 although both individual and species-specific responses exist across osteosarcomas, there are  
157 consistent responses to the most effective agents. Importantly, among the top hits were standard-  
158 of-care agents such as anthracyclines (e.g., doxorubicin, daunorubicin, idarubicin, epirubicin)

159 and methotrexate, which consistently killed all cell lines, while others showed wider variation  
 160 (e.g., etoposide) and limited efficacy (e.g., platinum-based chemotherapy) (**Figure 3C**). These  
 161 analyses indicate that this screening approach is capable of identifying relevant therapies for  
 162 osteosarcoma.

163 Unlike standard-of-care therapies, analysis of small molecule sensitivities at the  
 164 individual cell line level revealed heterogeneous responses across the panel of nine cell lines  
 165 (**Figure 3D**). Most drugs, such as belinostat (an HDAC inhibitor) or ponatinib (a multi-tyrosine  
 166 kinase inhibitor), were efficacious across more than one of the nine cell lines (**Figure 3D**). These  
 167 analyses reveal that substantial heterogeneity in drug response exists across osteosarcomas.

168 Given the extensive heterogeneity of response, we sought to identify novel compounds

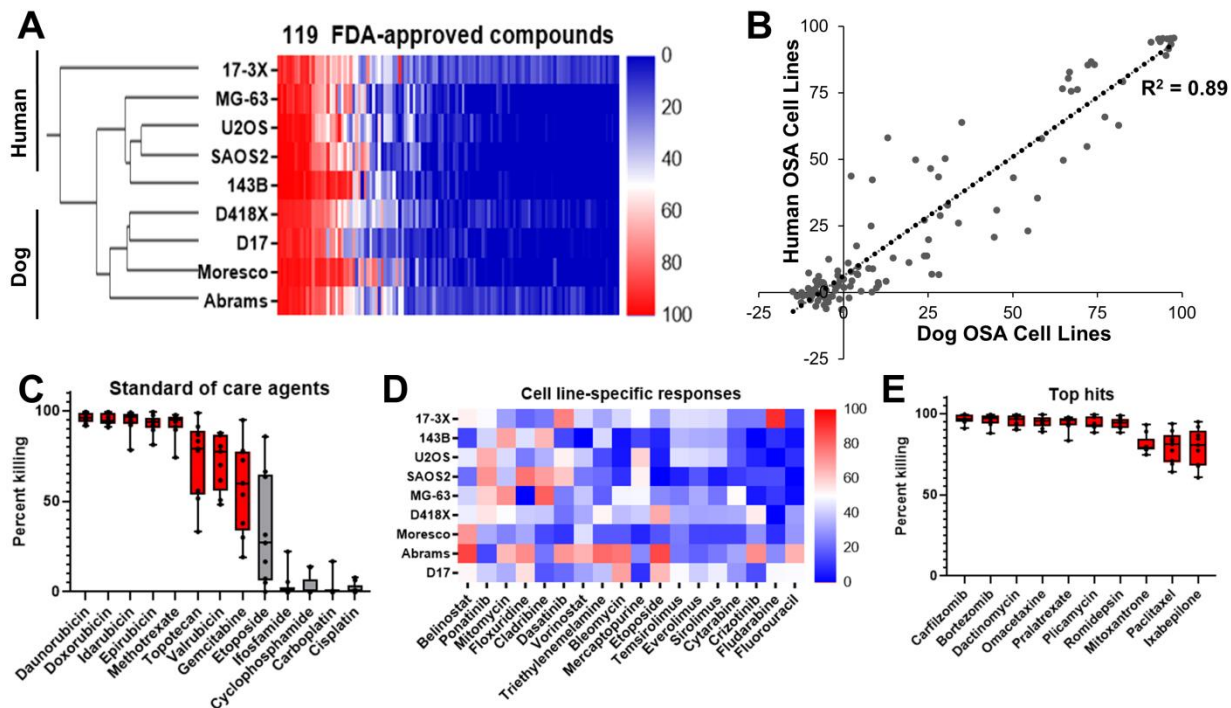

**Figure 3. Cross-species analysis of osteosarcoma drug response reveals sensitivity to proteasome inhibition.** **A.** A high-throughput screen of 119 oncology compounds across nine osteosarcoma cell lines revealed species-specific clustering by drug response. **B.** Although both individual and species-specific responses exist across osteosarcomas, there is a strong correlation between dog and human cell lines ( $R^2 = 0.89$ ). **C.** Standard-of-care agents, such as anthracyclines and methotrexate are among the top hits. **D.** Cell-line specific responses vary widely to targeted agents and other chemotherapeutics. **E.** Proteasome inhibitors carfilzomib and bortezomib demonstrate efficacy across all nine cell lines.



169 with efficacy across the entire panel of cell lines. Interestingly, the two most efficacious  
170 inhibitors, with an average of >95% killing for both inhibitors across all nine lines, were  
171 compounds that target the proteasome pathway (**Figure 3E**). Together, our results indicate that  
172 both human and canine osteosarcomas display heterogeneity in drug response across cell lines,  
173 with convergence on the proteasome pathway as a novel target to treat osteosarcoma.

174 To better understand the landscape of therapeutic vulnerabilities in osteosarcoma, we  
175 next performed high-throughput chemical screens in D418 and 17-3X patient-derived lines using  
176 2,100 bioactive compounds. This compound library is annotated by both target and pathway,  
177 enabling both protein- and pathway-level interrogation of chemical sensitivities. D418 and 17-  
178 3X cells displayed similar sensitivity profiles, with just 11.9% and 8.7% of compounds inducing  
179  $\geq 50\%$  killing in D418 and 17-3X, respectively (**Figure 4A, B**). Consistent with the results from  
180 the 119 compound screens, responses of D418 and 17-3X to all 2,100 compounds were  
181 correlated ( $R^2 = 0.54$ ;  $p < 0.0001$ ) (**Figure 4C**). Also consistent with the previous screens, each  
182 cell line displayed sensitivity to a subset of agents (**Figure 4D**). For example, D418 displayed  
183 sensitivity to multiple MEK and FAK inhibitors while 17-3X was uniquely sensitive to Chk  
184 inhibitors (**Figure 4D**). In addition to the unique sensitivities, both cell lines showed common  
185 sensitivity to standard-of-care anthracyclines and a number of novel agents (**Figure 4E**). These  
186 agents included the zinc pyrithione, the active ingredient in dandruff shampoo, the pan-selective  
187 Jumonji histone demethylase inhibitor, JIB-04, an NF- $\kappa$ B inhibitor (WS3), and two CDK  
188 inhibitors (alvocidib and SNS-032) (**Figure 4E**). Given that almost all small molecule inhibitors  
189 have multiple targets, we focused on targets for which at least three drugs showed >50% killing.  
190 We reasoned that filtering by drug targets with multiple hits in the screen would identify the  
191 most high-confidence drug targets for downstream validation. From these analyses, we identified

192 the CRM1 nuclear export and proteasome pathways as the top candidate targets (**Figure 4F**). A  
 193 total of 3 of 4 CRM1 inhibitors and 9 of 11 proteasome inhibitors showed >50% killing in both  
 194 D418 and 17-3X cell lines (**Figure 4G, H**). Consistent with these analyses, both the CRM1  
 195 inhibitor, verdinexor, and the proteasome inhibitor, bortezomib, showed dose-dependent  
 196 inhibition of 143B and 17-3X human osteosarcomas (**Figure 4I, J**) and D418 and D17 canine  
 197 osteosarcomas (**Figure 4K, L**), pinpointing the CRM1 and proteasome pathways as lead  
 198 candidates for *in vivo* validation.

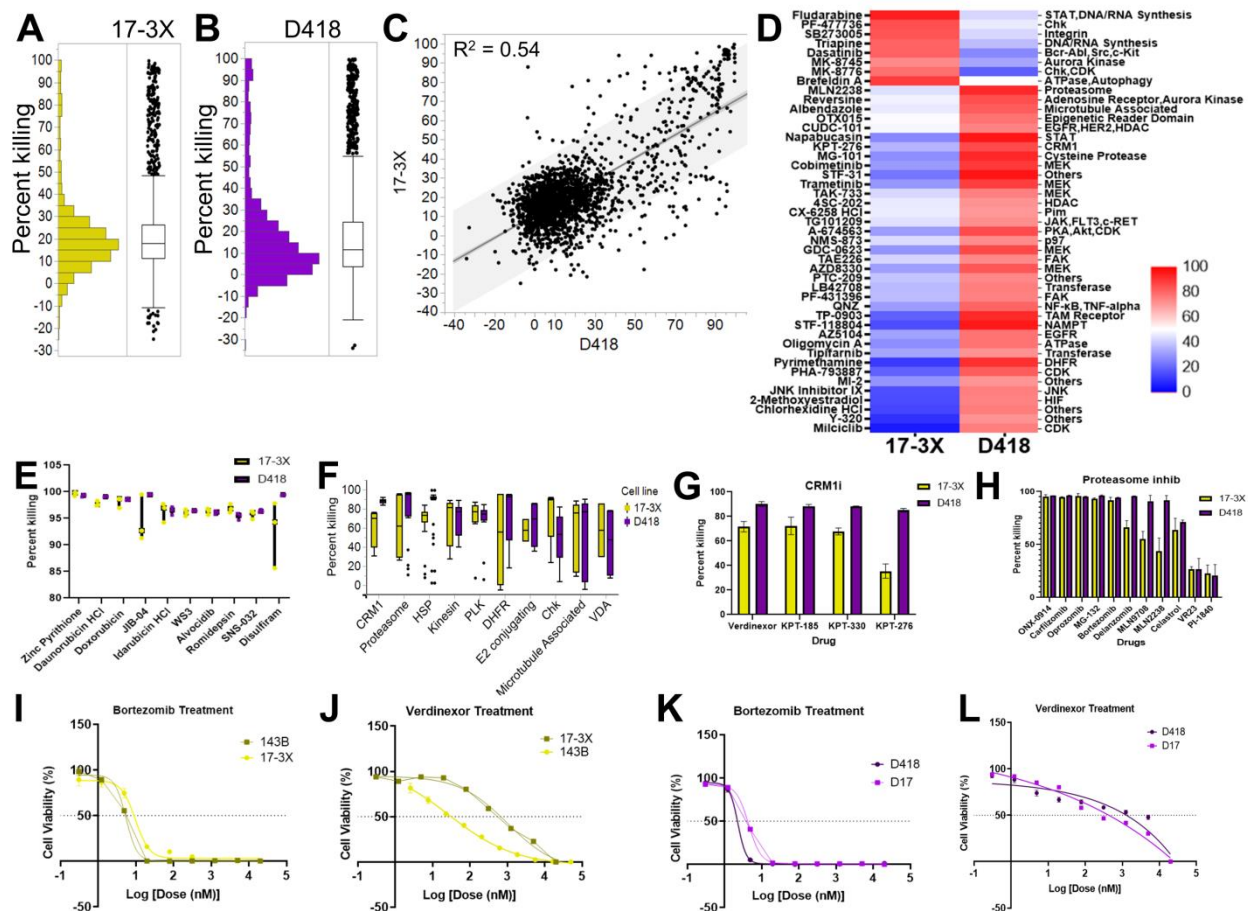

**Figure 4. Interrogating the therapeutic landscape of osteosarcoma pinpoints the proteasome and nuclear export pathways as promising therapeutic targets.** **A.** Chemical screens were performed using 2,100 compounds in 17-3X and **B.** D418 low-passage cell lines. **C.** Drug response was correlated across species ( $R^2 = 0.54$ ). **D.** Cell line-specific sensitivities for 17-3X and D418 cell lines. **E.** Top drugs, and **F.** top pathways for both cell lines. **G.** Cell line-specific response to each of the CRM1 inhibitors and **H.** proteasome inhibitors.

199

200 *In vivo* validation of proteasome and CRM1 pathway inhibitors to treat osteosarcoma

201 Our *in vitro* small molecule screens pinpointed the proteasome and CRM1 nuclear export  
202 pathways as two promising therapeutic vulnerabilities for osteosarcoma. Consistent with this,  
203 CRM1 protein is highly expressed (**Supplementary Figure 1A**) and localized within the nucleus  
204 of osteosarcoma cells (**Supplementary Figure 1B**). Moreover, elevated CRM1 expression is  
205 prognostic for poorer metastasis-free and overall survival in human osteosarcoma  
206 (**Supplementary Figure 1C, D**). We validated the therapeutic efficacy of proteasome and  
207 CRM1 inhibition in D418 PDXs and showed that both CRM1 inhibition and proteasome  
208 inhibition significantly reduced tumor growth (**Figure 5A**). CRM1 inhibition also significantly  
209 reduced 17-3X PDX tumor growth, while the proteasome inhibitor, bortezomib, had no effect as  
210 a single agent (**Figure 5B**). Mouse weights remained unchanged during the course of the  
211 treatment (**Supplementary Figure E, F**). Based on the positive results for CRM1 inhibitors in  
212 two PDXs, we further verified the efficacy of CRM1 inhibition in two additional PDXs, D071  
213 and D075 (**Figure 5C, D**).

214

215 Combined proteasome and CRM1 pathway inhibition act synergistically to prevent osteosarcoma  
216 growth.

217 Our cross-species pipeline pinpointed both CRM1 and proteasome pathways as promising  
218 single-agent therapies to treat osteosarcoma. However, although CRM1 inhibition was effective  
219 across all four of the PDXs tested, the proteasome inhibitor, bortezomib, was only capable of  
220 inhibiting growth in one of the two treated PDXs when used as a single agent. Interestingly,  
221 these pathways are being targeted with combination therapy for synergistic benefit in several

222 cancer types, including multiple myeloma [23], colorectal cancer [24], and fibrosarcoma [25].  
223 Based on these studies and our results, we hypothesized that combined CRM1 and proteasome  
224 blockade would have synergistic benefit for osteosarcoma. Consistent with this hypothesis, the  
225 combination of CRM1 and proteasome inhibition induced synergistic cell death for both D418  
226 and 17-3X cells (**Figure 5E, F**), suggesting that combined inhibition of the proteasome and  
227 CRM1 pathways may represent a rational strategy to treat osteosarcoma.

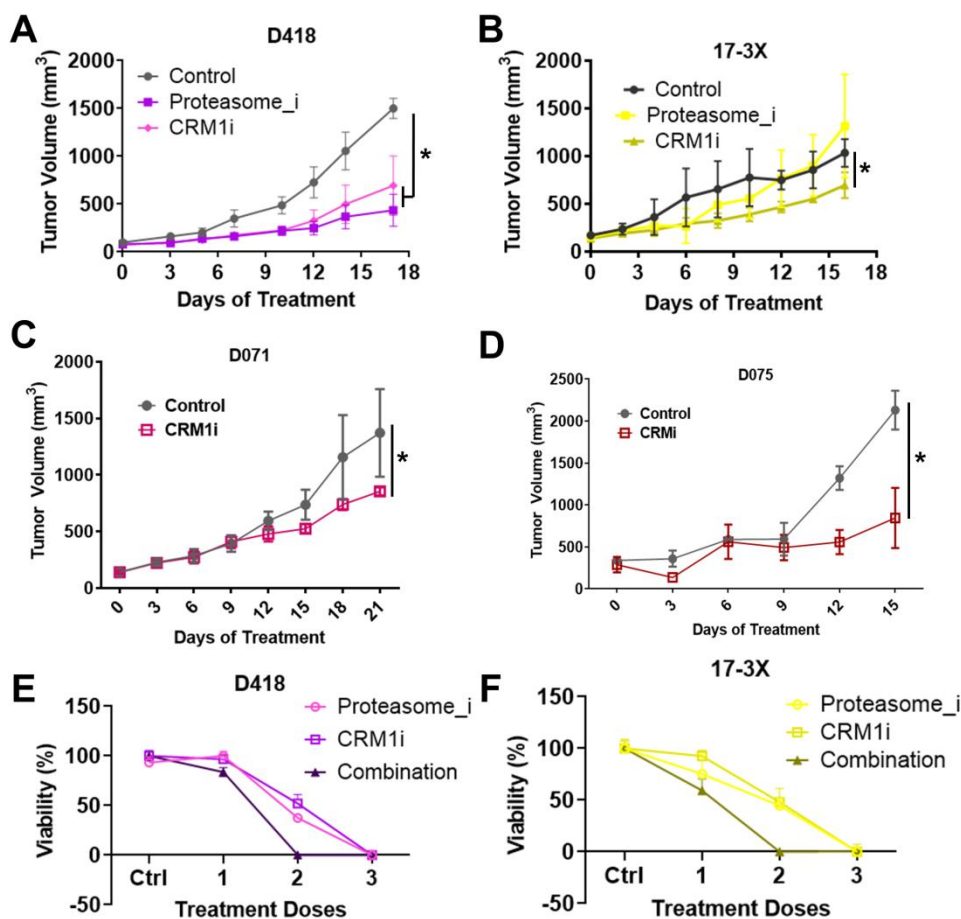

**Figure 5. Proteasome and CRM1 nuclear export pathway inhibition reduces osteosarcoma tumor growth and induces synergistic killing of osteosarcomas. A.** CRM1 inhibition (verdinexor), but not proteasome inhibition (bortezomib) significantly reduced tumor growth in 17-3X. **B.** Both CRM1 and proteasome inhibition significantly reduced D418 tumor growth. **C.** and **D.** Combined CRM1 and proteasome inhibition led to synergistic inhibition of 17-3X and **D.** D418 cell growth.

## 228 **Discussion**

229           In the present study, we sought to combine the utility of comparative oncology with  
230 patient-derived models of cancer and high-throughput small molecule screens to create a cross-  
231 species, personalized medicine pipeline. We applied this pipeline to osteosarcoma, a painful  
232 bone cancer that occurs predominantly in adolescents and for which almost no treatment  
233 progress has been made in nearly four decades. Using our pipeline, we identified therapeutic  
234 vulnerabilities for osteosarcoma that are patient-specific, common across patients, and common  
235 across species. Among the common therapeutic sensitivities identified were the proteasome and  
236 CRM1 nuclear export pathways. Both of these pathways have been explored in depth as potential  
237 cancer monotherapies for a range of cancer types [26, 27], and both of these therapies are  
238 currently approved by the U.S. Food and Drug Administration for the treatment of multiple  
239 myeloma [28, 29].

240           The proteasome is a multi-subunit complex that degrades misfolded, damaged, or unused  
241 proteins. The proteasome regulates the turnover of thousands of proteins in the cell [30], and  
242 proteasome inhibition creates an imbalance in the levels of misfolded proteins, leading to  
243 induction of the unfolded protein response, cellular stress, and apoptosis [31]. The CRM1  
244 nuclear export pathway transports proteins through the nuclear envelope to the cytoplasm [32].  
245 Like the proteasome, the nuclear export pathway is responsible for regulating thousands of  
246 proteins in the cell [33]. Interestingly, the proteasome and CRM1 export pathways are  
247 functionally linked. Proteasome inhibition in colorectal cancer cells induces CRM1-dependent  
248 nuclear export of ubiquitinated proteins, and inhibition of CRM1 prevents this export, leading to  
249 cell cycle arrest and apoptosis [24]. In addition, CRM1 inhibition re-sensitizes chemo-resistant  
250 myeloma cells to proteasome inhibition [34]. Inhibiting these inter-dependent pathways

251 synergistically inhibits multiple cancers [23-25]. Consistent with observations in other cancers,  
252 our data support the investigation of proteasome and CRM1 pathway inhibitors for  
253 osteosarcoma. In addition, combined proteasome and CRM1 pathway inhibition led to  
254 synergistic cytotoxicity *in vitro*, providing further evidence for the efficacy of dual proteasome  
255 and CRM1 pathway inhibition in treating osteosarcoma.

256         The establishment of a cross-species drug discovery pipeline provides a robust platform  
257 to identify and validate potential new therapies and offers several advantages. First, it capitalizes  
258 on the expanded canine patient population with spontaneous disease, thereby substantially  
259 improving access to patient samples for the development of patient-derived models of cancer.  
260 This is particularly useful for studying rare cancers. Indeed, we established more than double the  
261 number of PDXs from canines than from humans. Second, combining low passage and  
262 established cell lines with high-throughput chemical screens enables interrogation of hundreds to  
263 thousands of compounds simultaneously, pinpointing both patient-specific and population-level  
264 therapeutic vulnerabilities. Third, the use of chemical screens with complete target and pathway  
265 annotation allows for identification of single agent- and target/pathways-level drug sensitivities.  
266 Fourth, the use of matched cell lines and PDXs from the same patient provides a robust *in vivo*  
267 system to validate top candidates. While the *in vivo* studies are a critical validation step in the  
268 pipeline, these studies are costly and time consuming. Future iterations of the pipeline that  
269 exploit continued improvement in patient-derived models, such as patient-derived organoids [16,  
270 35, 36], are sure to improve the speed and cost-effectiveness of the pipeline and will further  
271 enable rapid translation of lead candidates into clinical practice [37]. Fifth, and perhaps most  
272 critically, the ability to test these candidates in veterinary clinical trials “closes the loop” of drug

273 discovery (**Figure 1A**) and enables testing of novel therapeutic strategies at a fraction of the cost  
274 and time necessary for human trials (reviewed in [13]).

275

## 276 **Materials and methods**

### 277 Generation of the patient- derived xenograft models

278 Canine sarcoma tumor tissue samples were collected from University of Illinois at Urbana  
279 Collage of Veterinary Medicine (Urbana, IL, USA) and Triangle Veterinary Referral Hospital  
280 (Durham, NC, USA) under Institutional Animal Care and Use committee (IACUC)-approved  
281 protocols. Human sarcoma tumor tissue samples were collected under a Duke IRB approved  
282 protocol (Pro00002435). All patients provided written informed consent to participate in the  
283 study. PDX models of the human and canine sarcoma were generated as described previously  
284 [37] and all *in vivo* mouse experiments were performed in accordance with the animal guidelines  
285 and with Duke University IACUC approval. To develop PDXs, human and canine tumor tissue  
286 samples were washed in phosphate buffered saline (PBS), dissected into small pieces (<2 mm),  
287 and injected into the flanks of 8-10-week-old JAX NOD.CB17-PrkdcSCID-J mice obtained from  
288 the Duke University Rodent Genetic and Breeding Core.

289

290

### 291 Patient derived cell line generation, authentication and detection of mouse cell contamination

292 Cell lines were generated from human and canine tumor samples. After washing in phosphate  
293 buffered saline (PBS), small pieces (< 2mm) of tumor tissue were mechanically homogenized.  
294 The homogenized tissue was then suspended in cell growth media and cultured in 12 well plates  
295 with DMEM + 10% FBS + 1% Penicillin/Streptomycin. To isolate tumor cells, growing colonies

296 of cells were isolated by trypsinization using O rings and cultured in new 12 well plates. This  
297 process was repeated until a colony of cells that resembled pure tumor cells in morphology was  
298 established.

299 For the cell lines generated from PDX, mouse cell contamination of the PDX cell lines  
300 were detected by PCR using human, canine, and mouse specific primers. Because mouse primers  
301 easily cross-react with canine and human gDNA, two different mouse primer sets were used. For  
302 human cell lines, human reverse (5' TCC AGG TTT ATG GAG GGT TC), human forward (5'  
303 TAG ACA TCG TAC TAC ACG ACA CG), mouse reverse (5' CCC AAA GAA TCA GAA  
304 CAG ATG C) and mouse forward (5' ATT ACA GCC GTA CTG CTC CTA T); for canine cell  
305 lines, canine reverse (5' GTA AAG GCT GCC TGA GGA TAA G), canine forward (5'GGT  
306 CCA GGG AAG ATC AGA AAT G), mouse reverse (AGG TGT CAC CAG GAC AAA TG)  
307 and mouse forward (CTG CTT CGA GCC ATA GAA CTA A) primer sets were used.

308 All PDX and patient derived cell lines were authenticated using the Duke University DNA  
309 Analysis Facility cell line authentication (CLA) service by analyzing DNA samples from each  
310 individual cell line for polymorphic short tandem repeat (STR) markers using the GenePrint 10  
311 kit from Promega (Madison, WI, USA).

312

313

#### 314 *In vitro* studies and high-throughput drug screen

315 All human (143B, MG63, SAOS, U2OS, 17-3X) and canine (Abrams, Moresco, D17, D418)  
316 osteosarcoma cell lines were cultured in DMEM + 10% FBS + 1% Penicillin/Streptomycin. The  
317 NIH Approved Oncology set (119 compounds) and Selleck Bioactives collection (2,100  
318 compounds) were screened in the Duke Functional Genomics Shared Resource as described



319 previously [37, 38]. Briefly, compounds were first stamped in triplicate into 384 well plates for a  
320 final concentration of 1  $\mu$ M using an Echo Acoustic Dispenser (Labcyte). Cells and media were  
321 then dispensed into plates using a WellMate (Thermo Fisher) at a density of 2,000 cells/well for  
322 each cell line. CellTiter-Glo (Promega) viability assays were performed after incubation of cells  
323 with compounds for 72 hours and luminescence was read using a Clariostar plate reader (BMG).  
324 Top drug targets as identified by the high-throughput drug screens, Bortezomib (PS-341),  
325 Verdinexor (KPT-335) and 17-DMAG (Alvespimycin) HCl were purchased from Selleck  
326 Chemicals (Houston, TX) and were solubilized in DMSO at 10 mM concentration to use for in  
327 vitro IC50 studies.

328

### 329 *In vivo* drug sensitivity validation

330 To validate *in vitro* drug screen results *in vivo*, 150  $\mu$ l homogenized PDX tissue-PBS  
331 suspensions at 150 mg/ml concentration were injected subcutaneously into the right flanks of the  
332 8 weeks old JAX NOD.CB17- PrkdcSCID-J mice. When the tumor volumes reached 100 mm<sup>3</sup>,  
333 mice were randomized (n = 5 mice for each treatment group and n = 5 for the control group) and  
334 1 mg/kg bortezomib, 25 mg/kg alvespimycin and 5 mg/kg verdinexor intraperitoneal injections  
335 were initiated twice a week. Tumor volumes were measured three times a week using calipers,  
336 and  $\frac{(Length \times Width^2)}{2}$  was used to calculate the tumor size. Mice were sacrificed on day 18 or if  
337 the tumor volume reached 1500 mm<sup>3</sup>.

338

### 339 Data analysis and statistics

340 JMP from SAS software (Cary, NC, USA) was used for the high-throughput drug screen data  
341 analysis. Analysis of Means was used to identify the top drug candidates from the 119-

342 compound drug screen and the 2,100-compound screen. Tumor volumes were recorded in  
343 GraphPad Prism 6 software (La Jolla, CA, USA). Two-way ANOVA analysis was used to  
344 compare the tumor volumes among the control and treatment groups.

345

## 346 **Acknowledgments**

347 This work was supported by the Triangle Center for Evolutionary Medicine (JAS), Hyundai  
348 Hope on Wheels (WCE), the Ryan Foundation (WCE), the Consortium for Canine Comparative  
349 Oncology (WCE/JAS), and an Orthopedic Research and Education Foundation Resident  
350 Research Grant (ALL). The authors acknowledge and thank the BioRepository & Precision  
351 Pathology Center (BRPC), a shared resource of the Duke University School of Medicine and  
352 Duke Cancer Institute, for providing access to human biospecimens used under institutional  
353 review board oversight in this work. The BRPC receives support from the P30 Cancer Center  
354 Support Education Foundation Resident Research Grant (P30 CA014236ALL). The authors  
355 acknowledge the Duke Functional Genomics Shared Resource for assistance with compound  
356 screens.

357

## 358 **Figure legends**

359

360 **Figure 1. A cross-species personalized medicine pipeline using patient-derived models of**  
361 **cancer. A.** The pipeline uses tumor samples from human and canine patients to establish  
362 matched patient-derived xenografts and low-passage cell lines. The cell lines are used in high-  
363 throughput drug screens, and results from the screen are validated in matched patient-derived  
364 xenografts. **B.** A summary of human (top) and **C.** dog (bottom) samples obtained and number of  
365 patient-derived xenografts created.

366

367 **Figure 2. Cross-species analysis of drug activity reveals remarkable similarity in response.**  
368 **A.** Establishment of matched patient-derived xenografts and cell lines from human (17-3X) and  
369 **B.** dog (D418) osteosarcomas. **C.** and **D.** Species-specific PCRs are used to verify the cell lines  
370 are purified cancer cell lines devoid of mouse fibroblast contamination. **E.** The estimated  
371 doubling times for the 17-3X and D418 cell lines are approximately 40 and **F.** 21 hours,  
372 respectively.

373

374 **Figure 3. Cross-species analysis of osteosarcoma drug response reveals sensitivity to**  
375 **proteasome inhibition. A.** A high-throughput screen of 119 oncology compounds across nine  
376 osteosarcoma cell lines revealed species-specific clustering by drug response. **B.** Although both  
377 individual and species-specific responses exist across osteosarcomas, there is a strong correlation  
378 between dog and human cell lines ( $R^2 = 0.89$ ). **C.** Standard-of-care agents, such as anthracyclines  
379 and methotrexate are among the top hits. **D.** Cell-line specific responses vary widely to targeted

380 agents and other chemotherapeutics. **E.** Proteasome inhibitors carfilzomib and bortezomib  
381 demonstrate efficacy across all nine cell lines.

382

383 **Figure 4. Interrogating the therapeutic landscape of osteosarcoma pinpoints the**  
384 **proteasome and nuclear export pathways as promising therapeutic targets. A.** Chemical  
385 screens were performed using 2,100 compounds in 17-3X and **B.** D418 low-passage cell lines. **C.**  
386 Drug response was correlated across species ( $R^2 = 0.54$ ). **D.** Cell line-specific sensitivities for  
387 17-3X and D418 cell lines. **E.** Top drugs, and **F.** top pathways for both cell lines. **G.** Cell line-  
388 specific response to each of the CRM1 inhibitors and **H.** proteasome inhibitors.

389

390 **Figure 5. Proteasome and CRM1 nuclear export pathway inhibition reduces osteosarcoma**  
391 **tumor growth and induces synergistic killing of osteosarcomas. A.** CRM1 inhibition  
392 (verdinexor), but not proteasome inhibition (bortezomib) significantly reduced tumor growth in  
393 17-3X. **B.** Both CRM1 and proteasome inhibition significantly reduced D418 tumor growth. **C.**  
394 and **D.** Combined CRM1 and proteasome inhibition led to synergistic inhibition of 17-3X and **D.**  
395 D418 cell growth.

396

397 **Supplementary Figure 1. CRM1 upregulation is prognostic for poorer clinical outcomes in**  
398 **osteosarcomas. A.** The CRM1 protein is expressed in both human and canine osteosarcoma, and  
399 **B.** Immunofluorescence staining reveals nuclear localization of CRM1 in human and canine  
400 osteosarcoma cells. **C.** Elevated CRM1 mRNA expression is prognostic for poorer metastasis-  
401 free and **D.** overall survival in human osteosarcomas. **E.** The average weight of mice with D418  
402 PDXs treated with bortezomib or verdinexor remained unchanged during treatment. **F.** The  
403 average weight of mice with 17-3X PDXs treated with bortezomib or verdinexor remained  
404 unchanged during treatment.

405

406

407

408

409

410

411

412

413

414

415

416

417

418

419

420

421

422

423

424

425

426 **References**

- 427 1. Mirabello, L., R.J. Troisi, and S.A. Savage, *International osteosarcoma incidence*  
428 *patterns in children and adolescents, middle ages and elderly persons*. Int J Cancer,  
429 2009. **125**(1): p. 229-34.
- 430 2. Egas-Bejar, D., et al., *Theranostic Profiling for Actionable Aberrations in Advanced High*  
431 *Risk Osteosarcoma with Aggressive Biology Reveals High Molecular Diversity: The*  
432 *Human Fingerprint Hypothesis*. Oncoscience, 2014. **1**(2): p. 167-179.
- 433 3. Friebele, J.C., et al., *Osteosarcoma: A Meta-Analysis and Review of the Literature*. Am J  
434 Orthop (Belle Mead NJ), 2015. **44**(12): p. 547-53.
- 435 4. He, H., J. Ni, and J. Huang, *Molecular mechanisms of chemoresistance in osteosarcoma*  
436 *(Review)*. Oncol Lett, 2014. **7**(5): p. 1352-1362.
- 437 5. Armenian, S. and S. Bhatia, *Predicting and Preventing Anthracycline-Related*  
438 *Cardiotoxicity*. Am Soc Clin Oncol Educ Book, 2018. **38**: p. 3-12.
- 439 6. Rodriguez, C.O., Jr., *Using canine osteosarcoma as a model to assess efficacy of novel*  
440 *therapies: can old dogs teach us new tricks?* Adv Exp Med Biol, 2014. **804**: p. 237-56.
- 441 7. Schiffman, J.D. and M. Breen, *Comparative oncology: what dogs and other species can*  
442 *teach us about humans with cancer*. Philos Trans R Soc Lond B Biol Sci, 2015.  
443 **370**(1673).
- 444 8. Paoloni, M., et al., *Canine tumor cross-species genomics uncovers targets linked to*  
445 *osteosarcoma progression*. BMC Genomics, 2009. **10**: p. 625.
- 446 9. Karlsson, E.K., et al., *Genome-wide analyses implicate 33 loci in heritable dog*  
447 *osteosarcoma, including regulatory variants near CDKN2A/B*. Genome Biol, 2013.  
448 **14**(12): p. R132.
- 449 10. Angstadt, A.Y., et al., *Characterization of canine osteosarcoma by array comparative*  
450 *genomic hybridization and RT-qPCR: signatures of genomic imbalance in canine*  
451 *osteosarcoma parallel the human counterpart*. Genes Chromosomes Cancer, 2011.  
452 **50**(11): p. 859-74.
- 453 11. Angstadt, A.Y., et al., *A genome-wide approach to comparative oncology: high-*  
454 *resolution oligonucleotide aCGH of canine and human osteosarcoma pinpoints shared*  
455 *microaberrations*. Cancer Genet, 2012. **205**(11): p. 572-87.
- 456 12. Lindblad-Toh, K., et al., *Genome sequence, comparative analysis and haplotype*  
457 *structure of the domestic dog*. Nature, 2005. **438**(7069): p. 803-19.
- 458 13. Somarelli, J.A., et al., *Improving Cancer Drug Discovery by Studying Cancer across the*  
459 *Tree of Life*. Mol Biol Evol, 2020. **37**(1): p. 11-17.
- 460 14. van de Wetering, M., et al., *Prospective derivation of a living organoid biobank of*  
461 *colorectal cancer patients*. Cell, 2015. **161**(4): p. 933-45.
- 462 15. Barretina, J., et al., *The Cancer Cell Line Encyclopedia enables predictive modelling of*  
463 *anticancer drug sensitivity*. Nature, 2012. **483**(7391): p. 603-7.
- 464 16. Vlachogiannis, G., et al., *Patient-derived organoids model treatment response of*  
465 *metastatic gastrointestinal cancers*. Science, 2018. **359**(6378): p. 920-926.
- 466 17. Koga, Y. and A. Ochiai, *Systematic Review of Patient-Derived Xenograft Models for*  
467 *Preclinical Studies of Anti-Cancer Drugs in Solid Tumors*. Cells, 2019. **8**(5).
- 468 18. Gao, H., et al., *High-throughput screening using patient-derived tumor xenografts to*  
469 *predict clinical trial drug response*. Nat Med, 2015. **21**(11): p. 1318-25.
- 470 19. Lu, M., et al., *Activation of the mTOR Pathway by Oxaliplatin in the Treatment of*  
471 *Colorectal Cancer Liver Metastasis*. PLoS One, 2017. **12**(1): p. e0169439.

- 472 20. Scognamiglio, G., et al., *Patient-derived organoids as a potential model to predict*  
473 *response to PD-1/PD-L1 checkpoint inhibitors*. Br J Cancer, 2019. **121**(11): p. 979-982.
- 474 21. Neal, J.T., et al., *Organoid Modeling of the Tumor Immune Microenvironment*. Cell,  
475 2018. **175**(7): p. 1972-1988 e16.
- 476 22. Pauli, C., et al., *Personalized In Vitro and In Vivo Cancer Models to Guide Precision*  
477 *Medicine*. Cancer Discov, 2017. **7**(5): p. 462-477.
- 478 23. Turner, J.G., et al., *XPO1 inhibitor combination therapy with bortezomib or carfilzomib*  
479 *induces nuclear localization of I $\kappa$ B $\alpha$  and overcomes acquired proteasome*  
480 *inhibitor resistance in human multiple myeloma*. Oncotarget, 2016. **7**(48): p. 78896-  
481 78909.
- 482 24. Wu, T., et al., *Nuclear Export of Ubiquitinated Proteins Determines the Sensitivity of*  
483 *Colorectal Cancer to Proteasome Inhibitor*. Mol Cancer Ther, 2017. **16**(4): p. 717-728.
- 484 25. Kashyap, T., et al., *Selinexor, a Selective Inhibitor of Nuclear Export (SINE) compound,*  
485 *acts through NF- $\kappa$ B deactivation and combines with proteasome inhibitors to*  
486 *synergistically induce tumor cell death*. Oncotarget, 2016. **7**(48): p. 78883-78895.
- 487 26. Mofers, A., et al., *Proteasome-associated deubiquitinases and cancer*. Cancer Metastasis  
488 Rev, 2017. **36**(4): p. 635-653.
- 489 27. Sun, Q., et al., *Inhibiting cancer cell hallmark features through nuclear export inhibition*.  
490 Signal Transduct Target Ther, 2016. **1**: p. 16010.
- 491 28. *XPO1 Inhibitor Approved for Multiple Myeloma*. Cancer Discov, 2019. **9**(9): p. 1150-  
492 1151.
- 493 29. Kane, R.C., et al., *United States Food and Drug Administration approval summary:*  
494 *bortezomib for the treatment of progressive multiple myeloma after one prior therapy*.  
495 Clin Cancer Res, 2006. **12**(10): p. 2955-60.
- 496 30. Kim, W., et al., *Systematic and quantitative assessment of the ubiquitin-modified*  
497 *proteome*. Mol Cell, 2011. **44**(2): p. 325-40.
- 498 31. Obeng, E.A., et al., *Proteasome inhibitors induce a terminal unfolded protein response in*  
499 *multiple myeloma cells*. Blood, 2006. **107**(12): p. 4907-16.
- 500 32. Stade, K., et al., *Exportin 1 (Crm1p) is an essential nuclear export factor*. Cell, 1997.  
501 **90**(6): p. 1041-50.
- 502 33. Taylor, J., et al., *Altered Nuclear Export Signal Recognition as a Driver of Oncogenesis*.  
503 Cancer Discov, 2019. **9**(10): p. 1452-1467.
- 504 34. Chanukuppa, V., et al., *XPO1 is a critical player for bortezomib resistance in multiple*  
505 *myeloma: A quantitative proteomic approach*. J Proteomics, 2019. **209**: p. 103504.
- 506 35. Bruun, J., et al., *Patient-Derived Organoids from Multiple Colorectal Cancer Liver*  
507 *Metastases Reveal Moderate Intra-patient Pharmacotranscriptomic Heterogeneity*. Clin  
508 Cancer Res, 2020.
- 509 36. Ooft, S.N., et al., *Patient-derived organoids can predict response to chemotherapy in*  
510 *metastatic colorectal cancer patients*. Sci Transl Med, 2019. **11**(513).
- 511 37. Rao, S.R., et al., *From the Clinic to the Bench and Back Again in One Dog Year: How a*  
512 *Cross-Species Pipeline to Identify New Treatments for Sarcoma Illuminates the Path*  
513 *Forward in Precision Medicine*. Front Oncol, 2020. **10**: p. 117.
- 514 38. Xu, S., et al., *An Integrative Systems Biology and Experimental Approach Identifies*  
515 *Convergence of Epithelial Plasticity, Metabolism, and Autophagy to Promote*  
516 *Chemoresistance*. J Clin Med, 2019. **8**(2).

**A**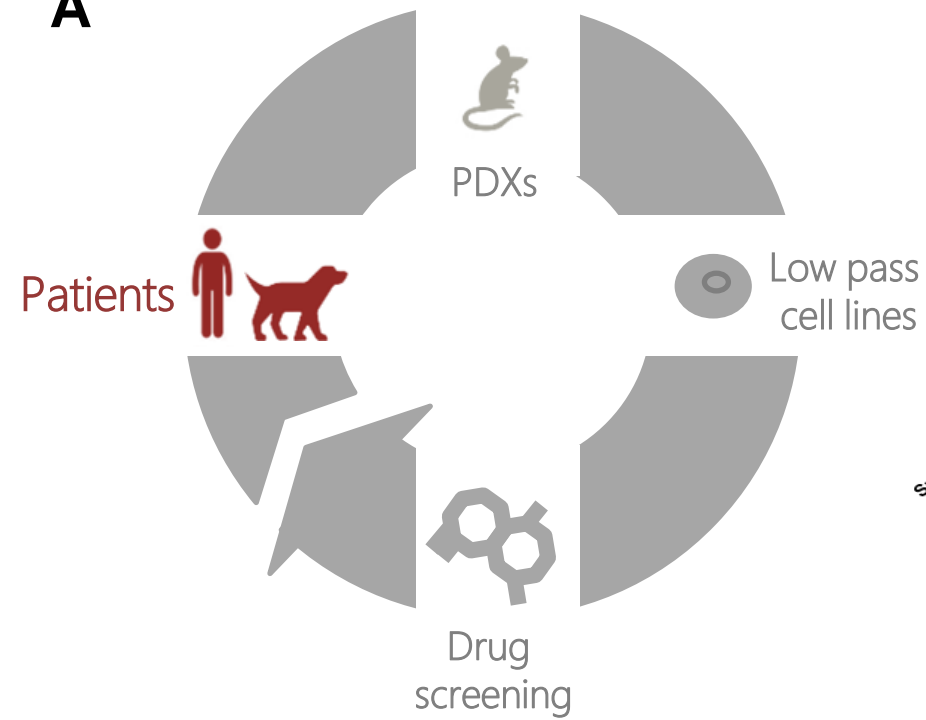**B**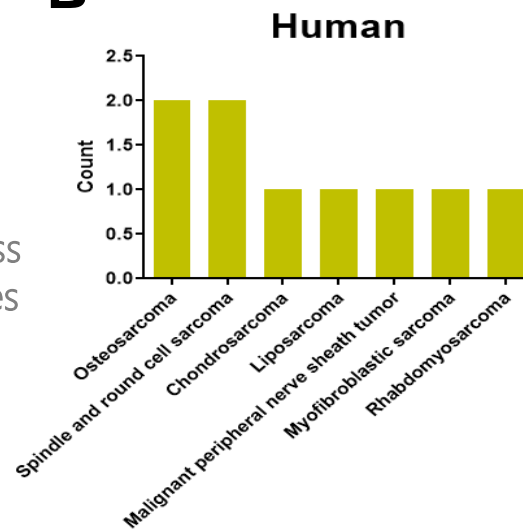**C**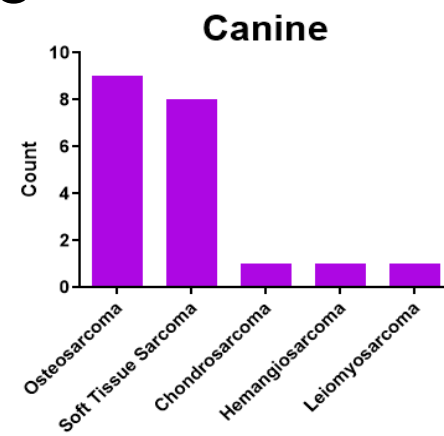

**A** 17-3X – human OS

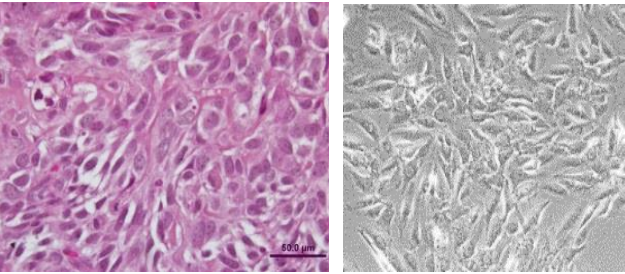

**B** D418 – dog OS

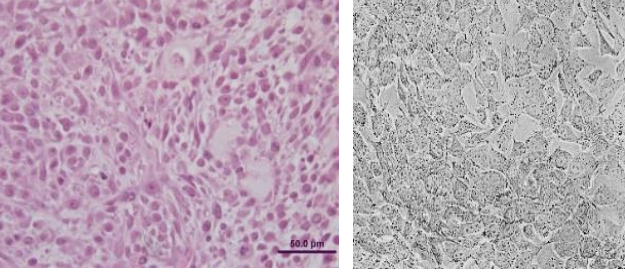

**C**

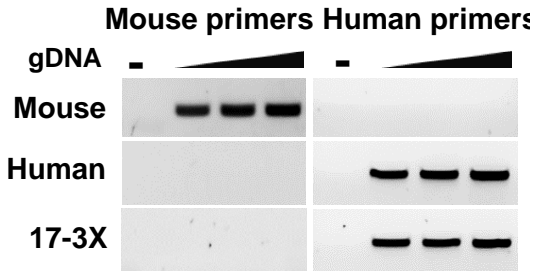

**D**

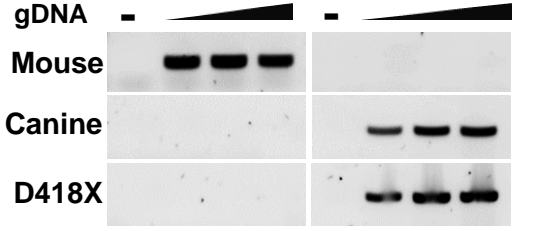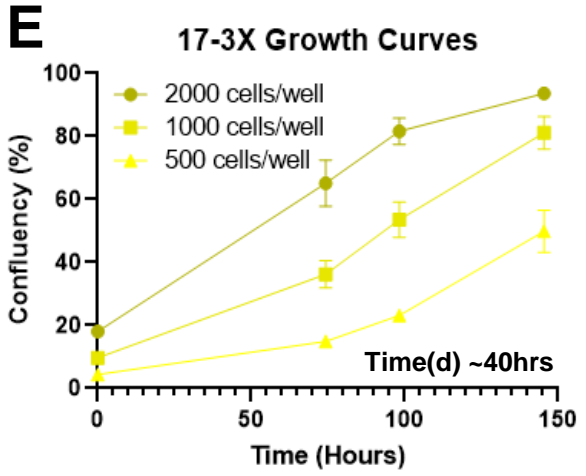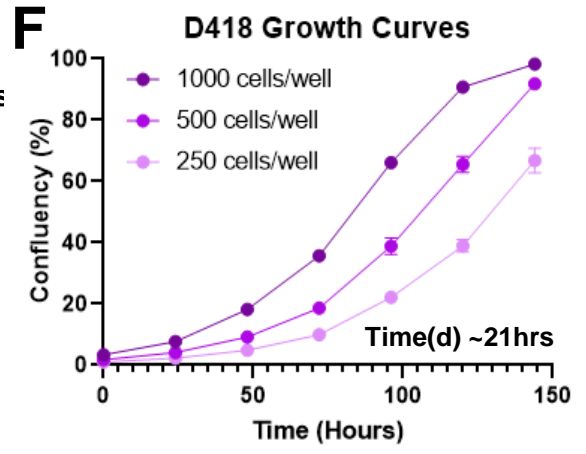

**A**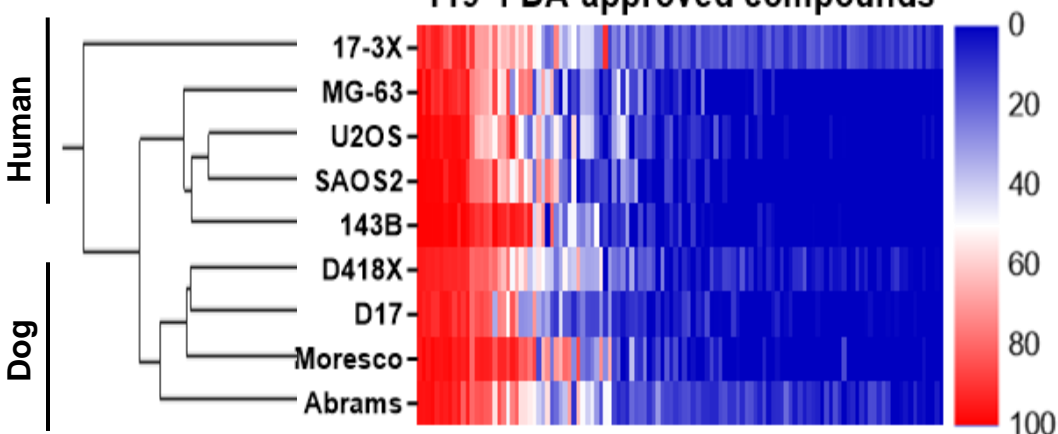**B**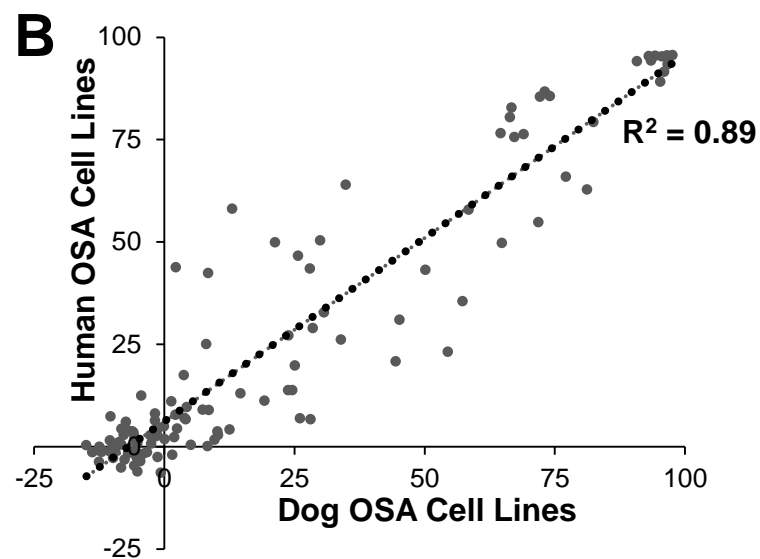**C**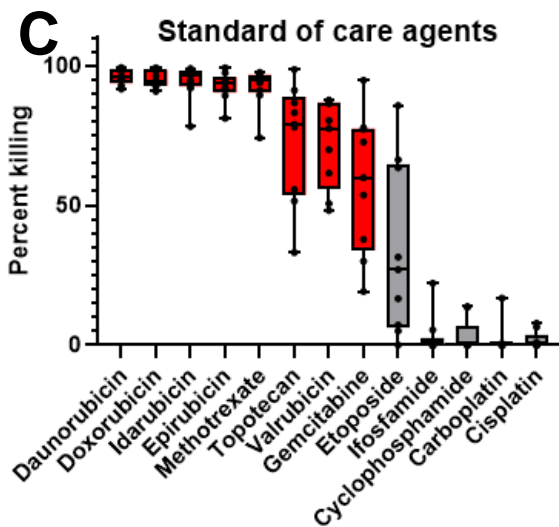**D**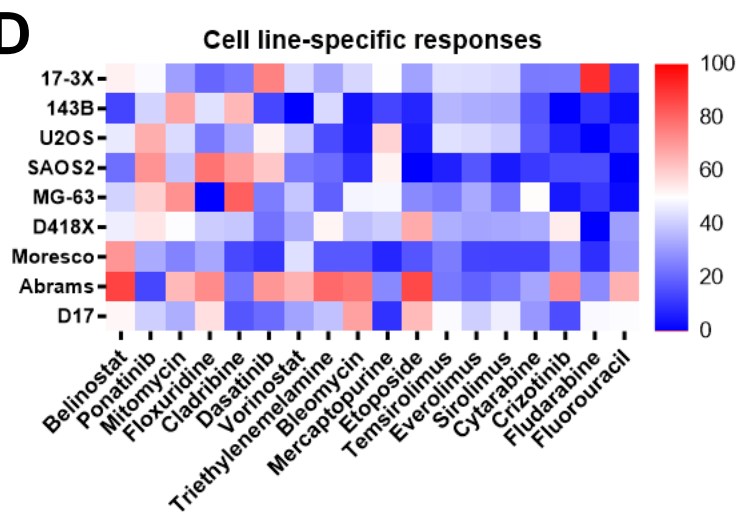**E**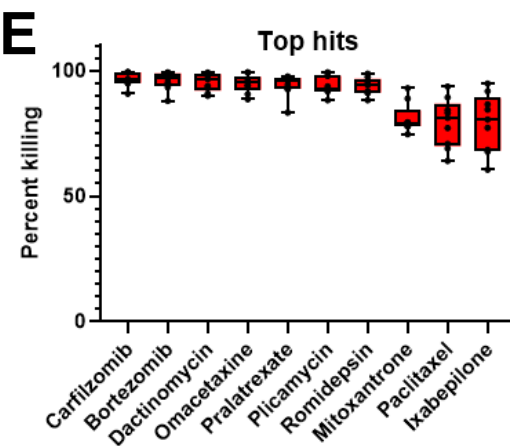



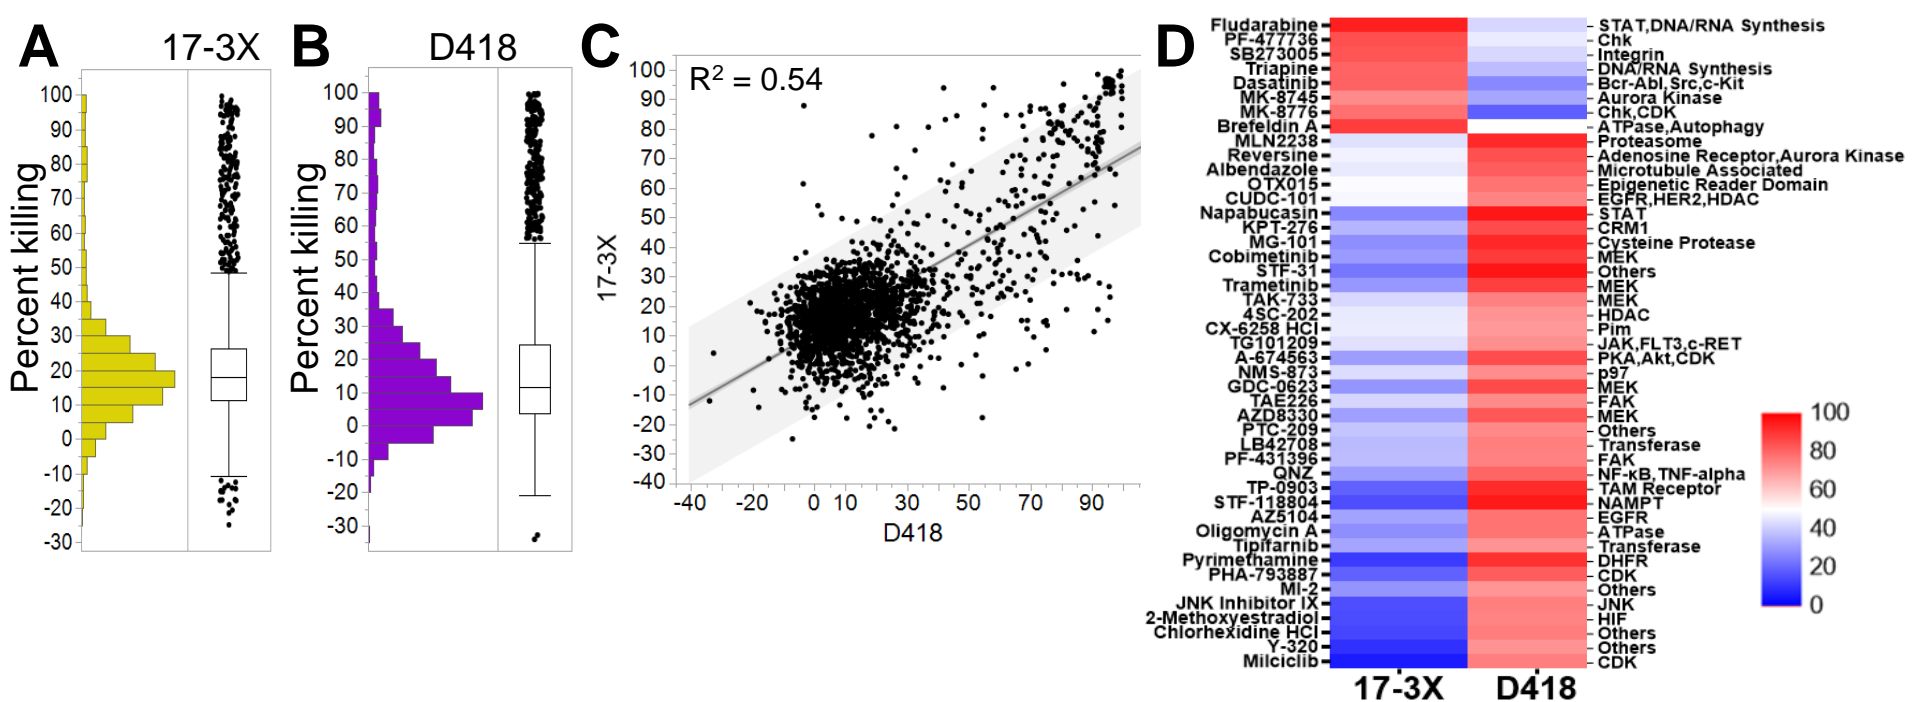

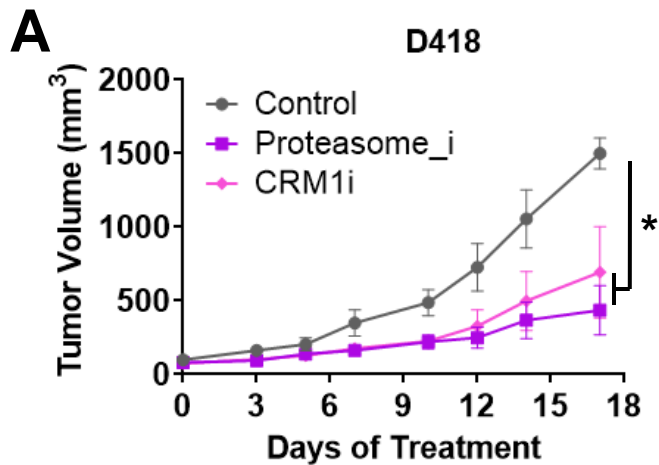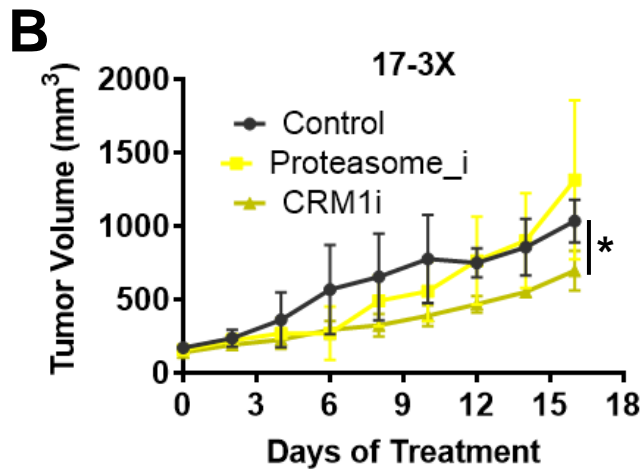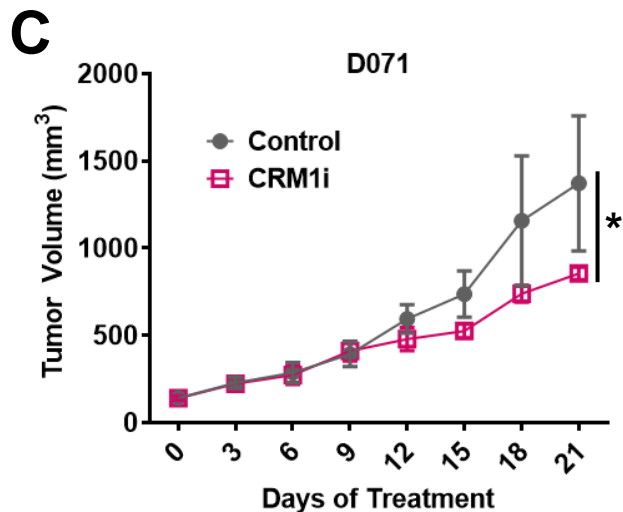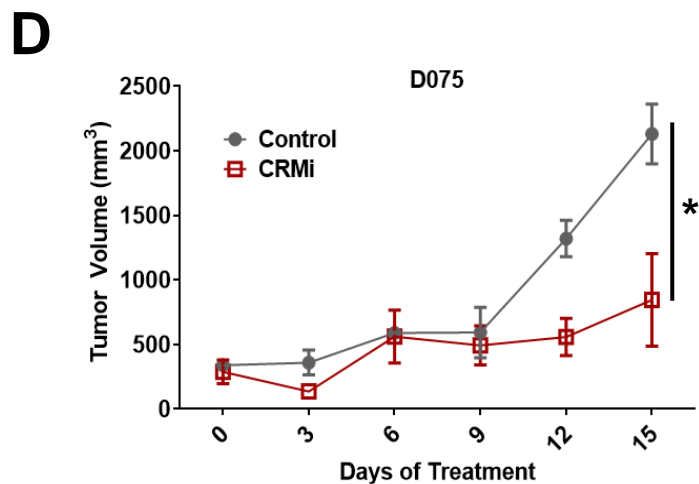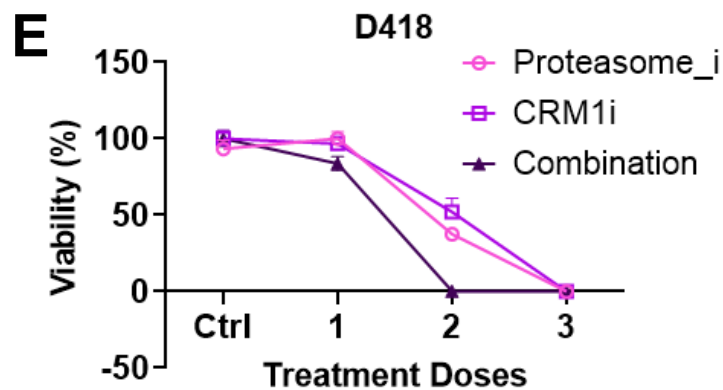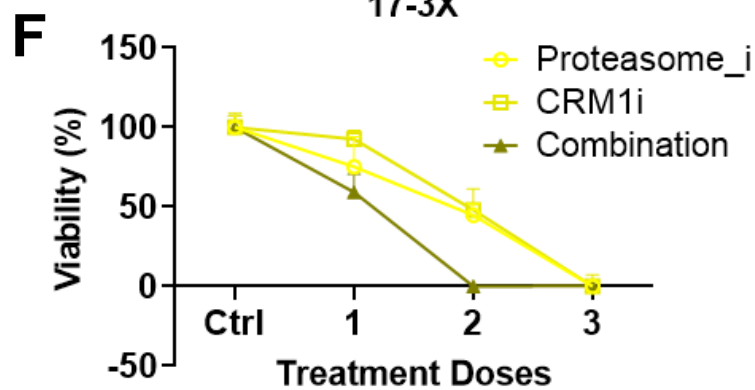

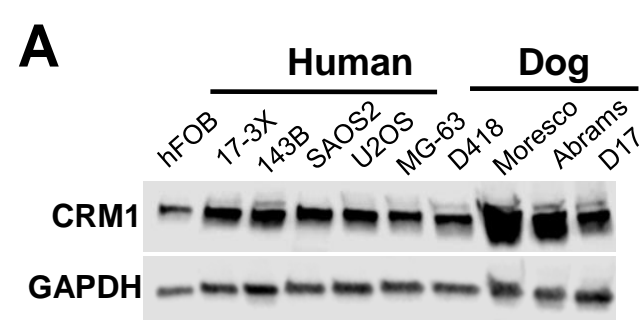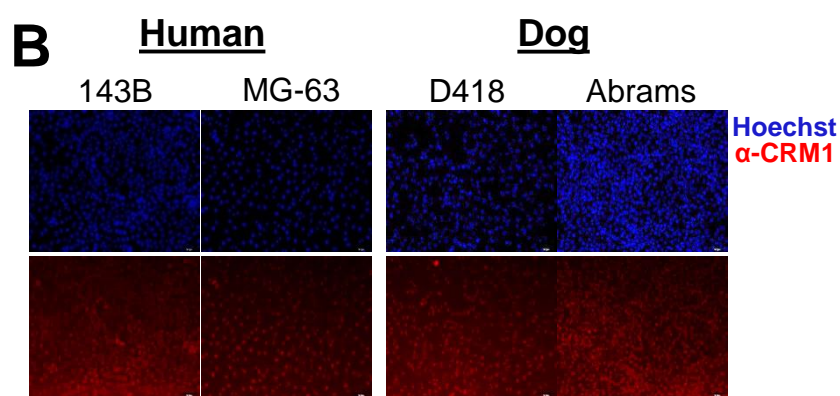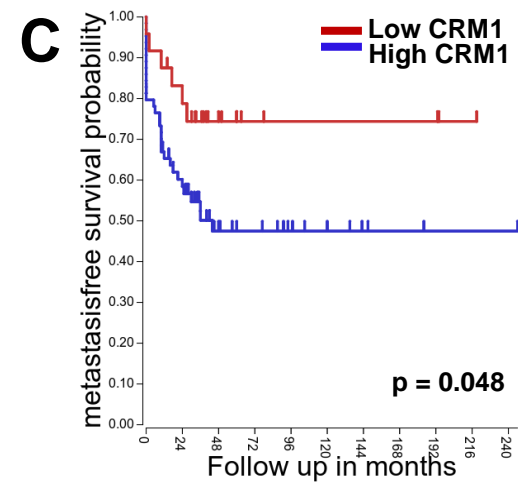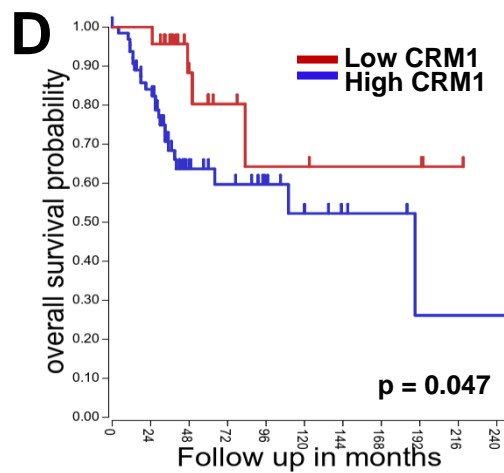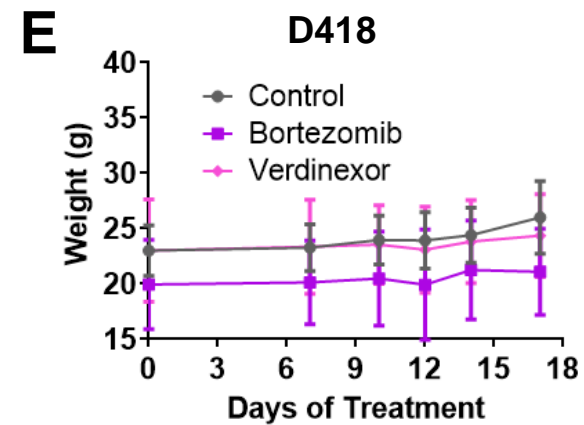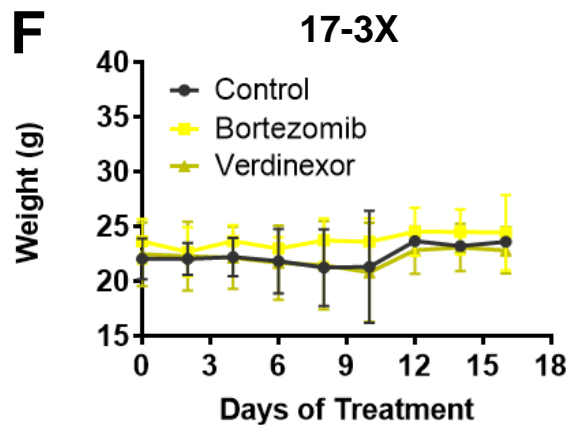

Source: https://www.biorxiv.org/content/biorxiv/early/2020/10/21/2020.10.19.346387.full.pdf
